# Supplementary material for: PIM1 regulates glycolysis and promotes tumor progression in hepatocellular carcinoma
Source: PubMed Central journal article supplement (PMC4484426; doi:10.18632/oncotarget.3534), 2015-03-12
Supplement: oncotarget-06-10880-s001.pdf [file oncotarget-06-10880-s001.pdf]

## **PIM1 regulates glycolysis and promotes tumor progression in hepatocellular carcinoma**

### **Supplementary Material**

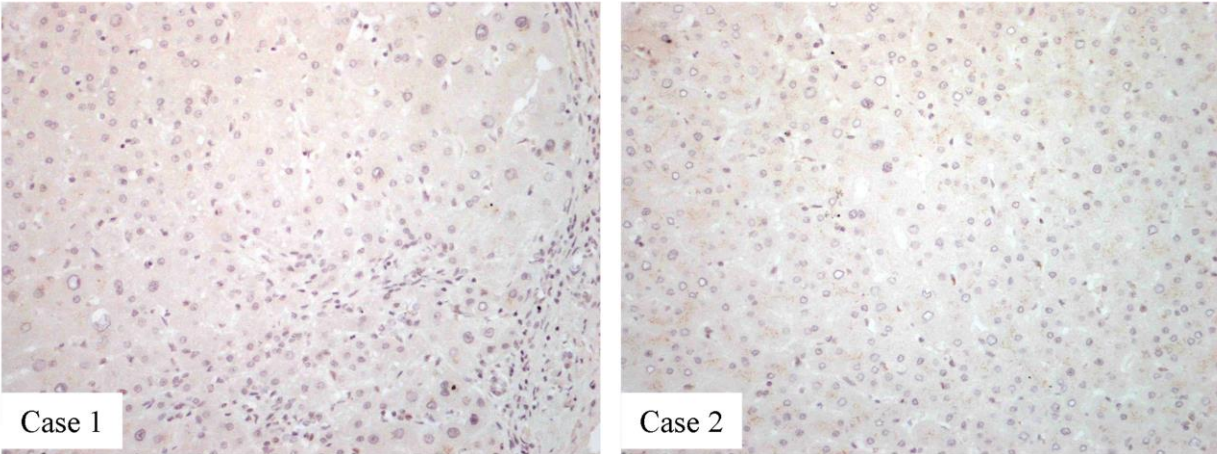

Supplementary Figure 1: PIM1 immunohistochemical staining in liver tissues from liver explant specimens for non-tumoral conditions.

**MHCC-97L**

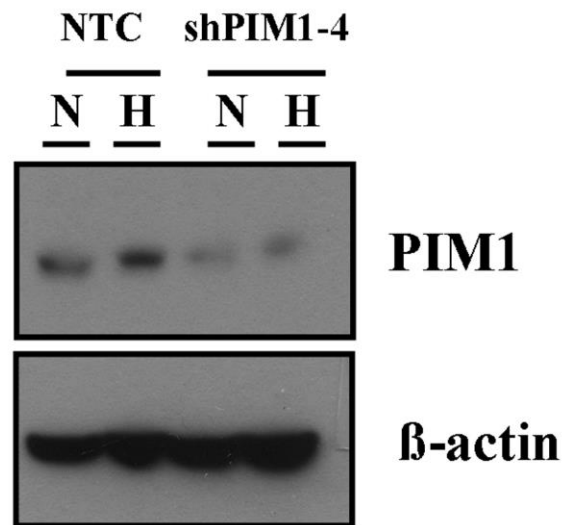

Supplementary Figure 2: Western blot analysis of PIM1 expression in PIM1 stable-knockdown (shPIM1-4) and NTC clones in MHCC-97L cell line.

**A**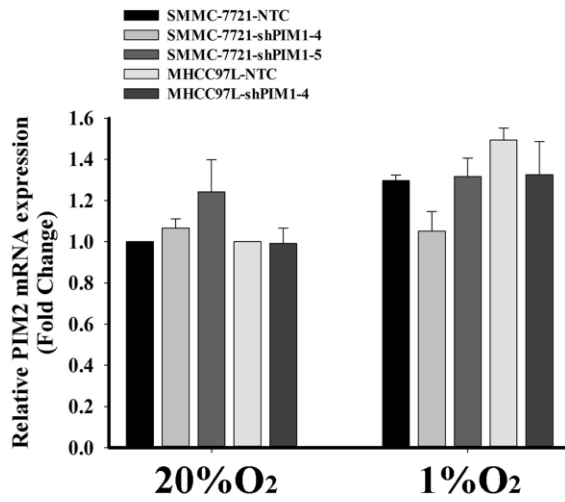**B**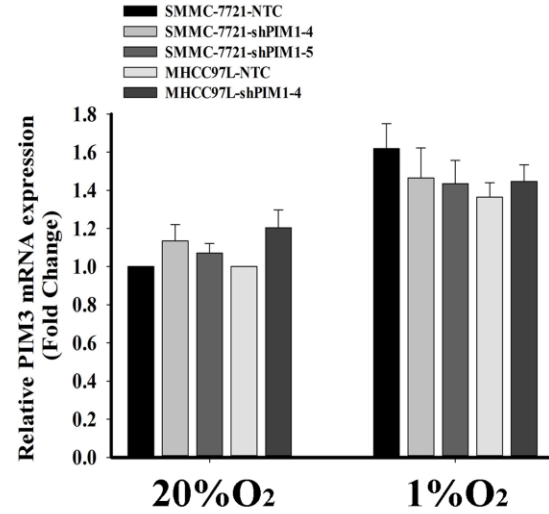

Supplementary Figure 3: Knockdown effect was specific for PIM1 in shPIM1 clones in both SMMC-7721 and MHCC-97L, but not for PIM2 and PIM3. Quantitative PCR analyses for (A) PIM2 and (B) PIM3 in NTC and shPIM1-4 and shPIM1-5 of SMMC-7721 and shPIM1-4 of MHCC-97L.

**SMMC-7721**

**MHCC-97L**

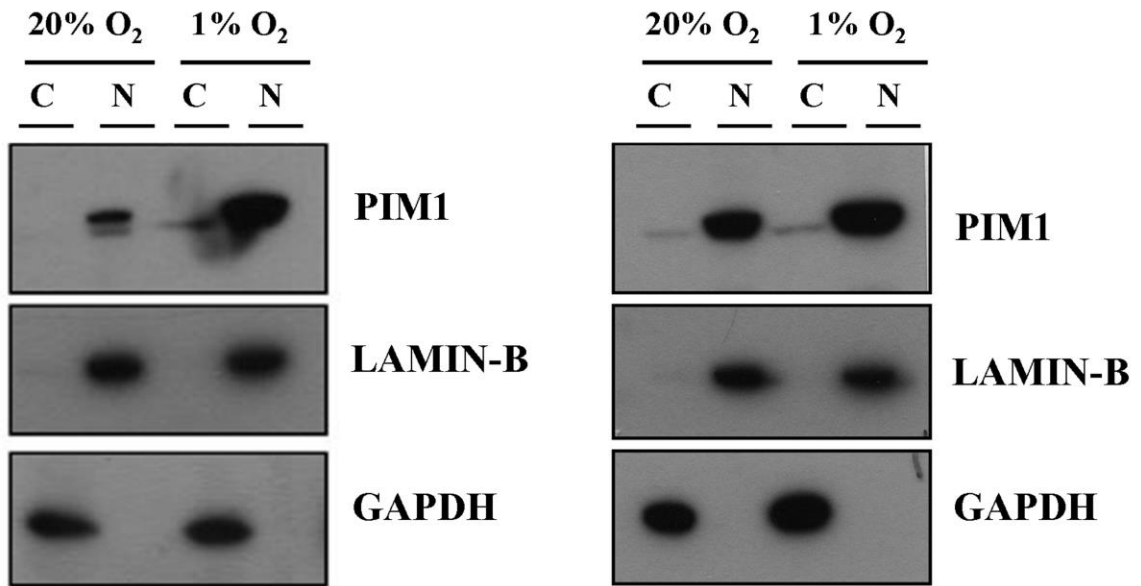

Supplementary Figure 4: Hypoxia enhanced PIM1 expression in the nuclear compartment of HCC cells. Upon hypoxic treatment, the nuclear fraction of PIM1 was markedly increased and predominant in SMMC-7721 and MHCC-97L.

Supplementary Table S1: Clinicopathological features of the primary HCC cohort

| Case no. | Number of positive-staining cells% | Nuclear/cytoplasmic staining# | Tumor grading (Edmondson's) | Microvascular invasion | Tumor necrosis | Tumor staging (AJCC) |
|----------|------------------------------------|-------------------------------|-----------------------------|------------------------|----------------|----------------------|
| 1        | 0                                  | -                             | 3                           | -                      | -              | I                    |
| 2        | 0                                  | -                             | 2                           | +                      | -              | II                   |
| 3        | 0                                  | -                             | 2                           | +                      | -              | II                   |
| 4        | 2                                  | N,C                           | 3                           | +                      | +              | II                   |
| 5        | 2                                  | N                             | 2                           | -                      | -              | I                    |
| 6        | 0                                  | -                             | 2                           | -                      | -              | I                    |
| 7        | 0                                  | -                             | 2                           | -                      | -              | I                    |
| 8        | 3                                  | N                             | 3                           | +                      | +              | II                   |
| 9        | 0                                  | -                             | 3                           | +                      | -              | III                  |
| 10       | 0                                  | -                             | 3                           | -                      | -              | I                    |
| 11       | 3                                  | N,C                           | 3                           | +                      | +              | II                   |
| 12       | 0                                  | -                             | 1                           | -                      | -              | I                    |
| 13       | 0                                  | -                             | 3                           | +                      | -              | II                   |
| 14       | 0                                  | -                             | 3                           | +                      | -              | III                  |
| 15       | 0                                  | -                             | 3                           | +                      | -              | II                   |
| 16       | 0                                  | -                             | 2                           | -                      | -              | I                    |
| 17       | 0                                  | -                             | 3                           | -                      | -              | I                    |
| 18       | 0                                  | -                             | 3                           | -                      | -              | I                    |
| 19       | 0                                  | -                             | 2                           | -                      | -              | I                    |
| 20       | 3                                  | N,C                           | 3                           | +                      | +              | III                  |
| 21       | 0                                  | -                             | 2                           | +                      | -              | II                   |
| 22       | 3                                  | N,C                           | 3                           | +                      | +              | II                   |
| 23       | 3                                  | N,C                           | 3                           | +                      | +              | III                  |
| 24       | 3                                  | N,C                           | 3                           | -                      | +              | III                  |
| 25       | 0                                  | -                             | 2                           | +                      | -              | III                  |
| 26       | 2                                  | N,C                           | 3                           | +                      | -              | III                  |
| 27       | 1                                  | N,C                           | 1                           | -                      | -              | I                    |
| 28       | 0                                  | -                             | 2                           | +                      | -              | III                  |
| 29       | 0                                  | -                             | 3                           | +                      | -              | III                  |
| 30       | 0                                  | -                             | 3                           | +                      | -              | III                  |
| 31       | 0                                  | -                             | 1                           | +                      | -              | II                   |
| 32       | 3                                  | N,C                           | 3                           | +                      | +              | II                   |
| 33       | 3                                  | N,C                           | 3                           | +                      | +              | III                  |
| 34       | 0                                  | -                             | 2                           | +                      | -              | III                  |
| 35       | 3                                  | N,C                           | 3                           | +                      | -              | IV                   |
| 36       | 3                                  | N                             | 2                           | -                      | -              | II                   |
| 37       | 0                                  | -                             | 3                           | +                      | -              | II                   |
| 38       | 0                                  | -                             | 2                           | +                      | -              | III                  |
| 39       | 1                                  | N                             | 2                           | -                      | +              | I                    |
| 40       | 0                                  | -                             | 3                           | -                      | +              | III                  |
| 41       | 0                                  | -                             | 2                           | -                      | -              | I                    |
| 42       | 2                                  | N                             | 1                           | -                      | +              | I                    |
| 43       | 0                                  | -                             | 2                           | +                      | -              | II                   |
| 44       | 0                                  | -                             | 2                           | +                      | -              | II                   |
| 45       | 2                                  | N,C                           | 3                           | +                      | -              | II                   |
| 46       | 1                                  | N,C                           | 3                           | +                      | -              | III                  |
| 47       | 1                                  | N                             | 3                           | -                      | -              | I                    |
| 48       | 0                                  | -                             | 3                           | +                      | -              | III                  |
| 49       | 3                                  | N,C                           | 3                           | +                      | -              | II                   |
| 50       | 0                                  | -                             | 2                           | -                      | -              | I                    |
| 51       | 0                                  | -                             | 3                           | -                      | -              | I                    |
| 52       | 3                                  | N,C                           | 3                           | +                      | +              | II                   |
| 53       | 0                                  | -                             | 2                           | +                      | -              | II                   |
| 54       | 0                                  | -                             | 2                           | -                      | -              | I                    |
| 55       | 2                                  | N                             | 3                           | -                      | -              | I                    |
| 56       | 0                                  | -                             | 3                           | +                      | +              | II                   |

% 1: 1-33%; 2: 34-66%; 3: >67%

# N: nuclear; C: cytoplasmic

Supplementary Table S2. Detailed clinicopathological features of the two cohorts with paired primary and metastatic HCC samples

| Case no. | Primary tumor                      |                               |                             |                        |                       | Metastatic tumor                  |                               |                             | Time interval@ (months) |
|----------|------------------------------------|-------------------------------|-----------------------------|------------------------|-----------------------|-----------------------------------|-------------------------------|-----------------------------|-------------------------|
|          | Number of positive-staining cells% | Nuclear/cytoplasmic staining# | Tumor grading (Edmondson's) | Microvascular invasion | Tumor staging (AJCC)^ | Number of positive-staining cells | Nuclear/cytoplasmic staining# | Tumor grading (Edmondson's) |                         |
| 1        | 3                                  | N                             | 3                           | +                      | II                    | 3                                 | N,C                           | 3                           | 117                     |
| 2        | 3                                  | N,C                           | 3                           | +                      | II                    | 3                                 | N                             | 3                           | 23                      |
| 3        | 0                                  | -                             | 3                           | +                      | II                    | 3                                 | N                             | 3                           | 8                       |
| 4        | 0                                  | -                             | 2                           | -                      | II                    | 0                                 | -                             | 2                           | 4                       |
| 5        | 0                                  | -                             | 2                           | -                      | I                     | 3                                 | N                             | 2                           | 21                      |
| 6        | 2                                  | N                             | 3                           | +                      | IV                    | 2                                 | N                             | 3                           | 3                       |
| 7        | 1                                  | N,C                           | 3                           | -                      | III                   | 3                                 | N,C                           | 3                           | 13                      |
| 8        | 1                                  | N                             | 3                           | -                      | II                    | 3                                 | N                             | 3                           | 28                      |
| 9        | 0                                  | -                             | 3                           | +                      | II                    | 3                                 | N                             | 3                           | 13                      |
| 10       | 0                                  | -                             | 2                           | -                      | II                    | 3                                 | N                             | 3                           | 5                       |
| 11       | 1                                  | N                             | 3                           | +                      | IV                    | 2                                 | N                             | 3                           | 0                       |
| 12       | 2                                  | N,C                           | 3                           | +                      | IV                    | 3                                 | N,C                           | 3                           | 0                       |
| 13       | 0                                  | -                             | 3                           | -                      | I                     | 2                                 | N                             | 3                           | 28                      |
| 14       | 3                                  | N,C                           | 3                           | -                      | I                     | 3                                 | N,C                           | 3                           | 43                      |
| 15       | 0                                  | -                             | 2                           | +                      | II                    | 3                                 | N,C                           | 3                           | 17                      |
| 16       | 0                                  | -                             | 2                           | -                      | I                     | 3                                 | N,C                           | 3                           | 34                      |
| 17       | 1                                  | N                             | 2                           | -                      | I                     | 3                                 | N,C                           | 2                           | 8                       |
| 18       | 1                                  | N,C                           | 3                           | -                      | I                     | 2                                 | N,C                           | 3                           | 21                      |
| 19       | 2                                  | N                             | 2                           | +                      | IV                    | 3                                 | N                             | 2                           | 0                       |
| 20       | 0                                  | -                             | 3                           | -                      | I                     | 3                                 | N,C                           | 3                           | 97                      |
| 21       | 0                                  | -                             | 3                           | +                      | IV                    | 0                                 | -                             | 3                           | 0                       |
| 22       | 0                                  | -                             | 3                           | +                      | IV                    | 2                                 | N                             | 3                           | 0                       |
| 23       | 0                                  | -                             | 2                           | +                      | IV                    | 0                                 | -                             | 2                           | 0                       |
| 24       | 0                                  | -                             | 3                           | +                      | II                    | 3                                 | N                             | 3                           | 48                      |
| 25       | 0                                  | -                             | 2                           | +                      | IV                    | 0                                 | -                             | 3                           | 0                       |
| 26       | 0                                  | -                             | 3                           | -                      | III                   | 3                                 | N                             | 3                           | 9                       |
| 27       | 1                                  | N                             | 3                           | +                      | II                    | 0                                 | -                             | 3                           | 26                      |
| 28       | 0                                  | -                             | 3                           | +                      | II                    | 0                                 | -                             | 3                           | 62                      |
| 29       | 0                                  | -                             | 3                           | +                      | III                   | 3                                 | N                             | 3                           | 8                       |
| 30       | 0                                  | -                             | 2                           | +                      | II                    | 0                                 | -                             | 3                           | 17                      |
| 31       | 0                                  | -                             | 2                           | +                      | II                    | 0                                 | -                             | 2                           | 16                      |
| 32       | 0                                  | -                             | 3                           | -                      | III                   | 0                                 | -                             | 3                           | 28                      |
| 33       | 0                                  | -                             | 3                           | -                      | IV                    | 1                                 | N                             | 3                           | 0                       |
| 34       | 0                                  | -                             | 3                           | +                      | III                   | 0                                 | -                             | 3                           | 22                      |
| 35       | 0                                  | -                             | 3                           | -                      | IV                    | 0                                 | -                             | 3                           | 0                       |
| 36       | 3                                  | N                             | 3                           | +                      | II                    | 3                                 | N,C                           | 3                           | 8                       |
| 37       | 0                                  | -                             | 3                           | +                      | IV                    | 2                                 | N                             | 3                           | 0                       |
| 38       | 1                                  | N,C                           | 3                           | +                      | IV                    | 1                                 | N,C                           | 3                           | 0                       |
| 39       | 0                                  | -                             | 2                           | +                      | II                    | 0                                 | -                             | 2                           | 68                      |
| 40       | 0                                  | -                             | 3                           | +                      | III                   | 0                                 | -                             | 3                           | 7                       |
| 41       | 0                                  | -                             | 2                           | -                      | I                     | 2                                 | N,C                           | 2                           | 14                      |
| 42       | 1                                  | N                             | 3                           | +                      | III                   | 3                                 | N                             | 3                           | 27                      |
| 43       | 0                                  | -                             | 3                           | +                      | II                    | 3                                 | N                             | 3                           | 74                      |

% 1: 1-33%; 2: 34-66%; 3: >67%

# N: nuclear; C: cytoplasmic

^ Tumor staging at diagnosis of primary tumor

@ time elapsed between resection of primary tumor and metastasis

Supplementary Table S3: Primer sequences for qPCR

|          | <u>Genes</u>    |         |                                |
|----------|-----------------|---------|--------------------------------|
| <b>1</b> | <b>PIM1</b>     | Forward | 5' CTCGCCGCGATTGAGGTCGATAA 3'  |
|          |                 | Reverse | 5' CAACTTGCCGGTGGCCATCAAACA 3' |
| <b>2</b> | <b>PIM2</b>     | Forward | 5' CCATTCCCGTGGAGTTGT 3'       |
|          |                 | Reverse | 5' GAAGCAGGGCACCAGAAC 3'       |
| <b>3</b> | <b>PIM3</b>     | Forward | 5' CGGAGGAGGGTCTCTCCAGAGTG 3'  |
|          |                 | Reverse | 5' ACCCTGCGCCGGCGGAAAG 3'      |
| <b>4</b> | <b>PKM2</b>     | Forward | 5' ATCGTCCTCACCAAGTCTGG 3'     |
|          |                 | Reverse | 5' GAAGATGCCACGGTACAGGT 3'     |
| <b>5</b> | <b>GLUT-1</b>   | Forward | 5' CGGGCCAAGAGTGTGCTAAA 3'     |
|          |                 | Reverse | 5' TGACGATACCGGAGCCAATG 3'     |
| <b>6</b> | <b>18s rRNA</b> | Forward | 5' GTAACCCGTTGAACCCATT 3'      |
|          |                 | Reverse | 5' CCATCCAATCGGTAGTAGCG 3'     |
